# Supplementary material
Source: PubMed Central journal article supplement (PMC3811466)
Supplement: AAC.01401-13_zac010132238so1.pdf [file AAC.01401-13_zac010132238so1.pdf]

1 **SUPPLEMENTAL MATERIAL**

| Metabolite    | [M+H] <sup>+</sup> | Product Ion | CE (V) | RT (min) |
|---------------|--------------------|-------------|--------|----------|
| Aspartate     | 134.0              | 88          | 13     | 1.15     |
| Homocysteine  | 136.1              | 89.99       | 12     | 1.15     |
| Lysine        | 146.85             | 84.05       | 15     | 0.85     |
| Glutamic Acid | 148.1              | 84.01       | 14     | 0.97     |
| Methionine    | 149.97             | 45.02       | 54     | 1.10     |
| Histidine     | 155.792            | 83.01       | 28     | 0.92     |
| Phenylalanine | 166.08             | 120.04      | 11     | 2.61     |
| Arginine      | 175.1              | 60.01       | 14     | 0.93     |
| Citrulline    | 176                | 113         | 16     | 0.93     |
| Tyrosine      | 182.1              | 91.01       | 28     | 1.34     |
| Tryptophan    | 205.07             | 146.01      | 21     | 3.81     |
| Cytidine      | 244.1              | 112         | 31     | 1.00     |
| Adenosine     | 268.1              | 136         | 18     | 2.03     |

2

3 **Table S1.** Endogenous metabolites detected by positive ionization. SRM transitions were developed for  
4 the detection of small molecules present in the plasma and urine of individuals receiving either  
5 Complera<sup>TM</sup> or Atripla<sup>TM</sup> antiretroviral therapy and for those present in the biological samples of non-  
6 infected, antiretroviral untreated individuals. The above metabolites were detected by a positive ion  
7 mode UHPLC-MS/MS screen using the stated parent mass, [M+H]<sup>+</sup>, to product ion transitions at the  
8 specified collision energies (CE) and resulted in the approximate retention times (RT).

9

| Metabolite    | [M-H] <sup>-</sup> | Product Ion | CE (V) | RT (min) |
|---------------|--------------------|-------------|--------|----------|
| Pyruvate      | 86.7               | 42.5        | 26     | 0.94     |
| Succinic Acid | 116.8              | 72.99       | 15     | 1.04     |
| Malic Acid    | 132.8              | 71.2        | 20     | 0.86     |
| Citrate       | 190.926            | 110.9       | 13     | 0.98     |
| Thymidine     | 241.1              | 124.96      | 20     | 1.08     |
| Uridine       | 242.9              | 109.96      | 20     | 0.99     |

10

11 **Table S2.** Endogenous metabolites detected by negative ionization. SRM transitions were developed for  
12 the detection of small molecules present in the plasma and urine of individuals receiving either  
13 Complera<sup>TM</sup> or Atripla<sup>TM</sup> antiretroviral therapy and for those present in the biological samples of non-  
14 infected, antiretroviral untreated individuals. The above metabolites were detected by a negative ion  
15 mode UHPLC-MS/MS screen using the stated parent mass, [M-H]<sup>-</sup>, to product ion transitions at the  
16 specified collision energies (CE) and resulted in the approximate retention times (RT).

17

18

19

20

21

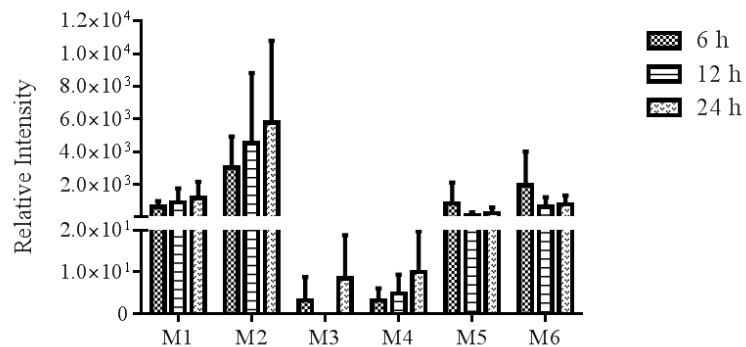

22

23 **Figure S1.** Metabolites detected in medium collected from RPV-treated primary human hepatocytes.

24 Hepatocytes from three donors were treated with either DMSO or 10  $\mu$ M RPV for 6, 12 and 24 h prior

25 to medium collection for UHPLC-MS/MS analysis in SRM mode using the following transitions:

26 383 $\rightarrow$ 222  $m/z$  (M1 and M2), 399 $\rightarrow$ 183  $m/z$  (M3), 399 $\rightarrow$ 196  $m/z$  (M4), 543 $\rightarrow$ 367  $m/z$  (M5) and

27 559 $\rightarrow$ 383  $m/z$  (M6). Glucuronide M7 formation was not detectable for any of the hepatocyte treatments.

28 Data are representative of the mean relative intensities for three separate hepatocyte preparations  $n=3 \pm$

29 SD.
